# Supplementary material
Source: publisher figshare collection journal article supplement (https://tandf.figshare.com/ndownloader/files/7417198)
Supplement: Supplementary file 1 [file 7417198]

**SUPPLEMENTARY MATERIALS**

**MODELING FETAL-GROWTH BIOMETRY WITH RESPONSE MODELING METHODOLOGY (RMM) AND COMPARISON TO CURRENT MODELS**

**Diamanta Benson-Karhi1, Haim Shore*2, Maya Malamud2**

February, 2016

1. Department of Mathematics and Computer Science, the Open University of Israel, P.O.B. 808, Raanana 43107, Israel
2. Department of Industrial Engineering, Faculty of Engineering Science, Ben-Gurion University of the Negev, POB 653, Beer-Sheva 84105, Israel

**I. APPENDIX**

**II. PLOTS OF ERROR CURVES**

**I. APPENDIX:** **Supporting information for the published reference centiles. References numbers as in Table 1.**

| Reference | BPD | HC | AC | FL |
| --- | --- | --- | --- | --- |
| 1 | Figures 3-4 Table 1 Tables 4-5 | Figures 5-6 Table 2 Tables 6-7 | -- | -- |
| 2 | -- | -- | Figures 3-4 Tables 1-4 | -- |
| 3 | -- | -- | -- | Figure 3 Tables 1-2 |
| 4 | Table 2 Figure 1 | Table V Figure 4 | Table IV Figure 3 | Table III Figure 2 |
| 5 | -- | Table 1 Table 2 (third column) | -- | -- |
| 6 | -- | -- | Table 1 Table 2 (second column) | -- |
| 7 | -- | -- | -- | Table 1 (sixth column) |
| 8 | Table III | Table III | Table III | Table III |
| 9 | Figure 2 Table 1 | Figure 2 Table 2 | Figure 2 Table 3 | Figure 2 Table 4 |
| 10 | Table 4 Figure 1 | Table 5 Figure 3 | -- | -- |
| 11 | -- | -- | Table 3 Figure 2 | Table 4 Figure 3 |
| 12 | Table I  Figure 1 | Table II  Figure 2 | Table III  Figure 3 | Table IV  Figure 4 |
| 13 | Figure 1(a), Figure 2(a) Figure 1(b), Figure 2(b) | Figure 1(c), Figure 2(c) | Figure 1(d), Figure 2(d) | Figure 1(a), Figure 2(a) |
| 14 | Table 2 Figure 2 | Table 3 Figure 3 | Table 4 Figure 4 | Table 5 Figure 1 Figure 5 |
| 15 | Figure 2(a) Figure 3(a) | Figure 2(b) Figure 3(b) | Figure 2(c) Figure 3(c) | Figure 2(a) Figure 3(a) |
| 16 | Table 4 Figure 4 | Table 6 Figure 6 | Table 2 figure 2 | Table 3 Figure 3 |

**II. PLOTS OF ERROR CURVES.**

Figure 1 - Error curve for approximating biparietal diameter model of Snijders & Nicolaides, 1994 by Hadlock et al. 1984 model and Response Modeling Methodology (RMM) model

Figure 2 - Error curve for approximating head circumference model of Snijders & Nicolaides, 1994 by Hadlock et al. 1984 model and Response Modeling Methodology (RMM) model

Figure 3 - Error curve for approximating abdominal circumference model of Snijders & Nicolaides, 1994 by Hadlock et al. 1984 model and Response Modeling Methodology (RMM) model

Figure 4 - Error curve for approximating femur length model of Snijders & Nicolaides, 1994 by Hadlock et al. 1984 model and Response Modeling Methodology (RMM) model

Figure 5 - Error curve for approximating biparietal diameter model of Kurmanavicius et al., 1999 by Hadlock et al. 1984 model, Snijders & Nicolaides model and Response Modeling Methodology (RMM) model

Figure 6 - Error curve for approximating head circumference model of Kurmanavicius et al., 1999 by Hadlock et al. 1984 model, Snijders & Nicolaides model and Response Modeling Methodology (RMM) model

Figure 7 - Error curve for approximating abdominal circumference model of Kurmanavicius et al., 1999 by Hadlock et al. 1984 model, Snijders & Nicolaides model and Response Modeling Methodology (RMM) model

Figure 8 - Error curve for approximating femur length model of Kurmanavicius et al., 1999 by Hadlock et al. 1984 model, Snijders & Nicolaides model and Response Modeling Methodology (RMM) model

Figure 9 - Error curve for approximating biparietal diameter (outer-inner) model of Leung et al., 2008 by Hadlock et al. 1984 model, Snijders & Nicolaides model and Response Modeling Methodology (RMM) model

Figure 10 - Error curve for approximating biparietal diameter (outer-outer) model of Leung et al., 2008 by Hadlock et al. 1984 model, Snijders & Nicolaides model and Response Modeling Methodology (RMM) model

Figure 11 - Error curve for approximating head circumference model of Leung et al., 2008 by Hadlock et al. 1984 model, Snijders & Nicolaides model and Response Modeling Methodology (RMM) model

Figure 12 - Error curve for approximating abdominal circumference model of Leung et al., 2008 by Hadlock et al. 1984 model, Snijders & Nicolaides model and Response Modeling Methodology (RMM) model

Figure 13 - Error curve for approximating femur length model of Leung et al., 2008 by Hadlock et al. 1984 model, Snijders & Nicolaides model and Response Modeling Methodology (RMM) model

Figure 14 - Error curve for approximating biparietal diameter model Mariusz et al., 2008 by Hadlock et al. 1984 model, Snijders & Nicolaides model and Response Modeling Methodology (RMM) model

Figure 15 - Error curve for approximating head circumference model of Mariusz et al., 2008 by Hadlock et al. 1984 model, Snijders & Nicolaides model and Response Modeling Methodology (RMM) model

Figure 16 - Error curve for approximating abdominal circumference model of Mariusz et al., 2008 by Hadlock et al. 1984 model, Snijders & Nicolaides model and Response Modeling Methodology (RMM) model

Figure 17 - Error curve for approximating femur length model of Mariusz et al., 2008 by Hadlock et al. 1984 model, Snijders & Nicolaides model and Response Modeling Methodology (RMM) model

Figure 18 - Error curve for approximating biparietal diameter model of Paladini et al., 2005 by Hadlock et al. 1984 model, Snijders & Nicolaides model and Response Modeling Methodology (RMM) model

Figure 19 - Error curve for approximating head circumference model of Paladini et al., 2005 by Hadlock et al. 1984 model, Snijders & Nicolaides model and Response Modeling Methodology (RMM) model

Figure 20 - Error curve for approximating abdominal circumference model of Paladini et al., 2005 by Hadlock et al. 1984 model, Snijders & Nicolaides model and Response Modeling Methodology (RMM) model

Figure 21 - Error curve for approximating femur length model of Paladini et al., 2005 by Hadlock et al. 1984 model, Snijders & Nicolaides model and Response Modeling Methodology (RMM) model

Figure 22 - Error curve for approximating abdominal circumference model of Hadlock et al., 1982 by Hadlock et al. 1984 model, Snijders & Nicolaides model and Response Modeling Methodology (RMM) model

Figure 23 - Error curve for approximating femur length model of Hadlock et al., 1982 by Hadlock et al. 1984 model, Snijders & Nicolaides model and Response Modeling Methodology (RMM) model

Figure 24 - Error curve for approximating head circumference model of Hadlock et al., 1982 by Hadlock et al. 1984 model, Snijders & Nicolaides model and Response Modeling Methodology (RMM) model

Figure 25 - Error curve for approximating abdominal circumference model of Hadlock et al., 1982 by Hadlock et al. 1984 model, Snijders & Nicolaides model and Response Modeling Methodology (RMM) model

Figure 26 - Error curve for approximating femur length model of Hadlock et al., 1982 by Hadlock et al. 1984 model, Snijders & Nicolaides model and Response Modeling Methodology (RMM) model

Figure 27 - Error curve for approximating head circumference model of Hadlock et al., 1982 by Hadlock et al. 1984 model, Snijders & Nicolaides model and Response Modeling Methodology (RMM) model

Figure 28 - Error curve for approximating biparietal diameter model of Salomon et al., 2006 by Hadlock et al. 1984 model, Snijders & Nicolaides model and Response Modeling Methodology (RMM) model

Figure 29 - Error curve for approximating head circumference model of Salomon et al., 2006 by Hadlock et al. 1984 model, Snijders & Nicolaides model and Response Modeling Methodology (RMM) model

Figure 30 - Error curve for approximating abdominal circumference model of Salomon et al., 2006 by Hadlock et al. 1984 model, Snijders & Nicolaides model and Response Modeling Methodology (RMM) model

Figure 31 - Error curve for approximating femur length model of Salomon et al., 2006 by Hadlock et al. 1984 model, Snijders & Nicolaides model and Response Modeling Methodology (RMM) model

Figure 32 - Error curve for approximating biparietal diameter model of Jung et al., 2007 by Hadlock et al. 1984 model, Snijders & Nicolaides model and Response Modeling Methodology (RMM) model

Figure 33 - Error curve for approximating head circumference model of Jung et al., 2007 by Hadlock et al. 1984 model, Snijders & Nicolaides model and Response Modeling Methodology (RMM) model

Figure 34 - Error curve for approximating abdominal circumference model of Jung et al., 2007 by Hadlock et al. 1984 model, Snijders & Nicolaides model and Response Modeling Methodology (RMM) model

Figure 35 - Error curve for approximating femur diaphysis length model of Jung et al., 2007 by Hadlock et al. 1984 model, Snijders & Nicolaides model and Response Modeling Methodology (RMM) model

Figure 36 - Error curve for approximating biparietal diameter (outer-inner) model of Chitty et al., 1994 by Hadlock et al. 1984 model, Snijders & Nicolaides model and Response Modeling Methodology (RMM) model

Figure 37 - Error curve for approximating biparietal diameter (outer-outer) model of Chitty et al., 1994 by Hadlock et al. 1984 model, Snijders & Nicolaides model and Response Modeling Methodology (RMM) model

Figure 38 - Error curve for approximating head circumference (plotted) model of Chitty et al., 1994 by Hadlock et al. 1984 model, Snijders & Nicolaides model and Response Modeling Methodology (RMM) model

Figure 39 – Error curve for approximating head circumference (derived) model of Chitty et al., 1994 by Hadlock et al. 1984 model, Snijders & Nicolaides model and Response Modeling Methodology (RMM) model

Figure 40 - Error curve for approximating abdominal circumference (plotted) model of Chitty et al., 1994 by Hadlock et al. 1984 model, Snijders & Nicolaides model and Response Modeling Methodology (RMM) model

Figure 41 - Error curve for approximating abdominal circumference (derived) model of Chitty et al., 1994 by Hadlock et al. 1984 model, Snijders & Nicolaides model and Response Modeling Methodology (RMM) model

Figure 42 - Error curve for approximating femur length model of Chitty et al., 1994 by Hadlock et al. 1984 model, Snijders & Nicolaides model and Response Modeling Methodology (RMM) model

Figure 43 - Error curve for approximating biparietal diameter model of Lai & Yeo, 1995 by Hadlock et al. 1984 model, Snijders & Nicolaides model and Response Modeling Methodology (RMM) model

Figure 44 - Error curve for approximating head circumference model of Lai & Yeo, 1995 by Hadlock et al. 1984 model, Snijders & Nicolaides model and Response Modeling Methodology (RMM) model

Figure 45 - Error curve for approximating abdominal circumference model of Lai & Yeo, 1995 by Hadlock et al. 1984 model, Snijders & Nicolaides model and Response Modeling Methodology (RMM) model

Figure 46 - Error curve for approximating femur length model of Lai & Yeo, 1995 by Hadlock et al. 1984 model, Snijders & Nicolaides model and Response Modeling Methodology (RMM) model
